# Supplementary material for: Oxygen-vacancy modified TiO2 nanoparticles as enhanced visible-light driven photocatalysts by wrapping and chemically bonding with graphite-like carbon
Source: Royal Society of Chemistry journal article supplement (doi:10.1039/c5ra27209b), 2016-01-01
Supplement: c5ra27209b1.pdf [file c5ra27209b1.pdf]

## Supporting information

### Oxygen vacancies modified TiO<sub>2</sub> nanoparticles as enhanced visible-light driven photocatalyst by wrapping and chemically bonding with graphite-like carbon

Xiuqi Qin<sup>a</sup>, Fang He<sup>\*a</sup>, Lixia Chen<sup>a</sup>, Yuhuan Meng<sup>a</sup>, Jing Liu<sup>a</sup>, Naiqin Zhao<sup>a</sup>, Yuan Huang<sup>a</sup>

<sup>a</sup>Tianjin Key Laboratory of Composite and Functional Materials, Department of Materials Science and Engineering, Tianjin University, Tianjin, 300072, P. R. China. Email: fanghe\_tju@tju.edu.cn

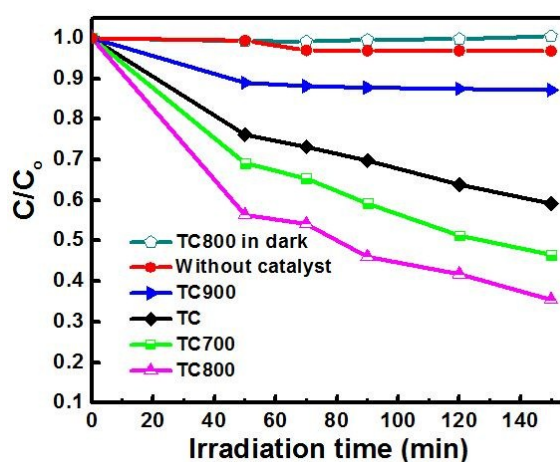

Fig. S1 Photocatalytic degradation of RhB over photocatalysts treated with different annealing temperatures under visible light.

The TC sample annealed at 700 °C, 800 °C and 900 °C are denoted as TC700, TC800 and TC900 respectively. And to determine the optimum annealing temperature, the three samples are also used to degrade RhB under the same condition. As shown in Fig. S1, TC800 exhibits better photocatalytic activity than any other annealed sample in the photo, suggesting that annealing at 800 °C is the best choice. Meanwhile, TC800 also shows significantly enhanced property, compared to TC.

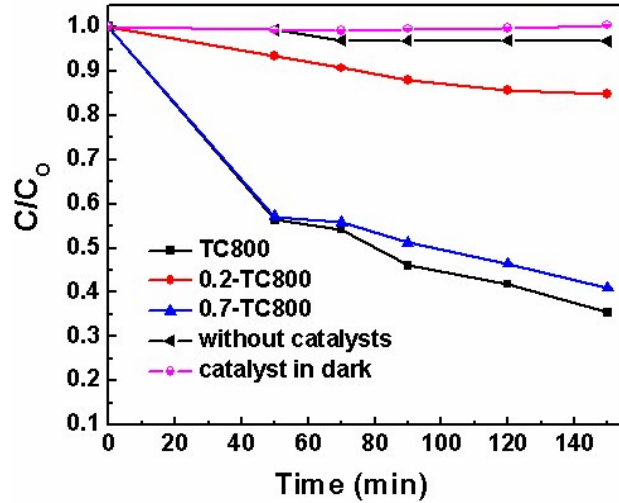

Fig. S2 Photocatalytic degradation of RhB over photocatalysts with different thickness of graphite-like carbon under visible light.

A series of experiments with the single variable of different glucose concentrations were carried out after the optimum annealing temperature was determined. The molar concentrations of glucose solution were set to 0.2M, 0.5M and 0.7M respectively. After the hydrothermal reaction, all the samples were annealed at 800 °C to figure out the appropriate thickness of graphite-like carbon. And they were accordingly named as 0.2TC-800, 0.5TC-800 (i.e. TC800) and 0.7TC-800. By degrading RhB under the same condition, the degradation rates of 0.2TC-800, TC800 and 0.7TC-800 were 15.2%, 64.5% and 58.9%, indicating that the thickness of carbon layer in TC800 was appropriate.

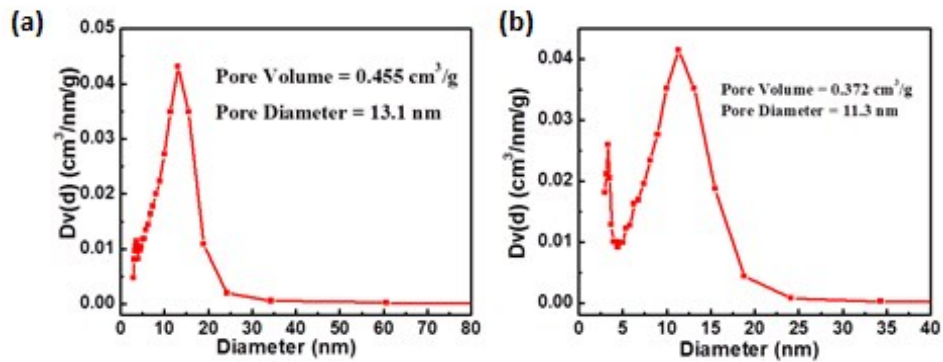

Fig. S3 Pore size distributions of (a) TC and (b) TC800

Table S1 Comparison of  $D_1$  with previous literatures with the same degradation time of RhB under visible light for 150 min.

| Materials                                                          | degradation agent | mass of RhB    | mass of catalyst (g) | $D$   | $D_1$ (min <sup>-1</sup> ) |
|--------------------------------------------------------------------|-------------------|----------------|----------------------|-------|----------------------------|
| Carbon-TiO <sub>2</sub> nanohybrids <sup>23</sup>                  | RhB               | 100 mL*20 mg/L | 0.155                | 0.76  | 0.0654                     |
| Mesoporous carbon-doped crystalline TiO <sub>2</sub> <sup>24</sup> | RhB               | 100 mL*5 mg/L  | 0.1                  | 0.35  | 0.0117                     |
| TC800 (our sample)                                                 | RhB               | 40 mL*10 mg/L  | 0.005                | 0.645 | 0.344                      |
